# Supplementary material
Source: PubMed Central journal article supplement (PMC11330275)
Supplement: NIHMS1617272-supplement-Supp_tableS1-5.pdf [file NIHMS1617272-supplement-Supp_tableS1-5.pdf]

| <b>Myocardial Injury Score</b> |                                                                                             |
|--------------------------------|---------------------------------------------------------------------------------------------|
| 0                              | No damage                                                                                   |
| 1                              | Mild interstitial lymphocytic infiltrate and rupture of myocardial fibers                   |
| 2                              | Moderate interstitial lymphocytic infiltrate, edema, myocardial cell swelling and necrosis  |
| 3                              | Severe necrosis with contraction band, neutrophil infiltrate and compressed capillaries     |
| 4                              | Highly severe diffused necrosis with contraction band, neutrophil infiltrate and hemorrhage |

Supplemental Table 1.

Supplemental Table 2.1: Canonical pathway analysis summary for rat cardiac IRI.





|                                                         |       |        |        |       |        |       |
|---------------------------------------------------------|-------|--------|--------|-------|--------|-------|
| Cysteine Biosynthesis III (mammalia)                    | 1.000 | 0.860  | 0.632  | 1.106 | N/A    | 0.000 |
| Pyrimidine Deoxyribonucleotides De Novo Biosynthesis    | 1.000 | 0.958  | 1.633  | 0.000 | N/A    | 0.552 |
| Purine Nucleotides Degradation II (Aerobic)             | 1.000 | 1.321  | 0.378  | 0.576 | N/A    | 0.604 |
| Arginine Biosynthesis IV                                | 1.000 | 1.385  | N/A    | 0.299 | N/A    | 0.000 |
| Arginine Degradation VI (Arginase 2 Pathway)            | 1.000 | 1.385  | 1.000  | 1.333 | N/A    | 0.000 |
| Proline Biosynthesis II (from Arginine)                 | 1.000 | 1.385  | N/A    | 0.710 | N/A    | 0.000 |
| Superpathway of Citrulline Metabolism                   | 1.000 | 2.295  | 0.378  | 1.122 | N/A    | 0.000 |
| Spermine and Spermidine Degradation I                   | 1.000 | 2.362  | 1.000  | 2.303 | N/A    | 0.000 |
| PEDF Signaling                                          | 0.928 | 1.533  | 1.219  | 2.264 | N/A    | 0.391 |
| Neuregulin Signaling                                    | 0.898 | 1.903  | 1.461  | 1.680 | N/A    | 0.000 |
| GDNF Family Ligand-Receptor Interactions                | 0.898 | 2.389  | 1.061  | 2.426 | N/A    | 0.000 |
| Non-Small Cell Lung Cancer Signaling                    | 0.894 | 1.114  | 0.853  | 1.801 | N/A    | 0.448 |
| Endothelin-1 Signaling                                  | 0.894 | 6.381  | 0.906  | 5.125 | 1.000  | 0.482 |
| EGF Signaling                                           | 0.816 | 1.397  | 0.816  | 1.239 | N/A    | 0.198 |
| Citrulline Biosynthesis                                 | 0.816 | 1.941  | 0.447  | 1.207 | N/A    | 0.000 |
| Prostanoid Biosynthesis                                 | 0.816 | 1.941  | 0.816  | 1.865 | N/A    | 0.000 |
| Regulation of Cellular Mechanics by Calpain Protease    | 0.775 | 1.715  | 1.291  | 1.810 | 2.000  | 2.607 |
| Cardiac Hypertrophy Signaling (Enhanced)                | 0.745 | 10.477 | 0.606  | 7.662 | -0.447 | 0.000 |
| ERK/MAPK Signaling                                      | 0.728 | 2.811  | 0.585  | 3.711 | N/A    | 0.245 |
| Histamine Degradation                                   | 0.707 | 1.054  | 0.707  | 0.982 | N/A    | 0.000 |
| Adenosine Nucleotides Degradation II                    | 0.707 | 1.333  | 0.378  | 0.858 | N/A    | 0.665 |
| Aldosterone Signaling in Epithelial Cells               | 0.707 | 3.893  | 0.354  | 3.964 | N/A    | 0.000 |
| IL-1 Signaling                                          | 0.688 | 2.602  | 0.728  | 1.579 | N/A    | 0.000 |
| Insulin Receptor Signaling                              | 0.687 | 3.240  | 0.651  | 4.866 | N/A    | 0.445 |
| VEGF Family Ligand-Receptor Interactions                | 0.667 | 3.034  | 0.649  | 3.686 | N/A    | 0.778 |
| Cyclins and Cell Cycle Regulation                       | 0.655 | 1.557  | 1.400  | 2.129 | -2.646 | 4.701 |
| Wnt/ $\beta$ -catenin Signaling                         | 0.603 | 0.841  | 0.420  | 1.777 | N/A    | 0.000 |
| cAMP-mediated signaling                                 | 0.585 | 2.478  | 1.254  | 3.250 | N/A    | 0.000 |
| April Mediated Signaling                                | 0.577 | 0.544  | 0.832  | 0.667 | N/A    | 0.369 |
| Intrinsic Prothrombin Activation Pathway                | 0.577 | 0.575  | 1.155  | 0.506 | N/A    | 0.922 |
| Ceramide Signaling                                      | 0.539 | 1.799  | 0.686  | 2.283 | N/A    | 0.000 |
| IL-9 Signaling                                          | 0.535 | 1.139  | 0.243  | 1.897 | N/A    | 0.310 |
| TWEAK Signaling                                         | 0.535 | 1.351  | 0.775  | 1.570 | N/A    | 0.404 |
| IGF-1 Signaling                                         | 0.507 | 2.622  | 0.667  | 2.851 | N/A    | 0.000 |
| PCP pathway                                             | 0.500 | 0.404  | 0.243  | 0.461 | N/A    | 0.000 |
| Thrombin Signaling                                      | 0.500 | 4.569  | 0.985  | 4.775 | N/A    | 0.000 |
| D-myo-inositol-5-phosphate Metabolism                   | 0.492 | 4.731  | -0.124 | 3.947 | N/A    | 0.000 |
| CDK5 Signaling                                          | 0.480 | 2.767  | 0.480  | 2.212 | N/A    | 0.000 |
| VDR/RXR Activation                                      | 0.471 | 1.305  | 0.000  | 0.954 | N/A    | 0.000 |
| UVC-Induced MAPK Signaling                              | 0.471 | 1.540  | 1.414  | 1.683 | N/A    | 0.000 |
| Triacylglycerol Biosynthesis                            | 0.471 | 1.621  | 0.688  | 1.785 | N/A    | 0.303 |
| Cell Cycle: G1/S Checkpoint Regulation                  | 0.447 | 1.143  | 0.000  | 2.006 | 2.000  | 2.578 |
| Wnt/ $\text{Ca}^{+}$ pathway                            | 0.408 | 1.788  | 1.043  | 1.352 | N/A    | 0.000 |
| P2Y Purigenic Receptor Signaling Pathway                | 0.405 | 5.874  | 0.412  | 4.666 | N/A    | 0.000 |
| D-myo-inositol (1,4,5,6)-Tetrakisphosphate Biosynthesis | 0.397 | 3.773  | -0.132 | 3.363 | N/A    | 0.000 |
| D-myo-inositol (3,4,5,6)-tetrakisphosphate Biosynthesis | 0.397 | 3.773  | -0.132 | 3.363 | N/A    | 0.000 |
| Colanic Acid Building Blocks Biosynthesis               | 0.378 | 1.359  | 1.414  | 1.823 | N/A    | 0.000 |
| nNOS Signaling in Neurons                               | 0.378 | 1.414  | 0.378  | 1.024 | N/A    | 0.310 |
| Sucrose Degradation V (Mammalian)                       | 0.378 | 2.799  | N/A    | 0.354 | N/A    | 2.169 |
| Mitochondrial L-carnitine Shuttle Pathway               | 0.333 | 1.831  | 0.000  | 2.302 | N/A    | 0.665 |
| Melanocyte Development and Pigmentation Signaling       | 0.324 | 3.060  | 0.480  | 3.034 | N/A    | 0.000 |
| Glutathione Redox Reactions I                           | 0.302 | 1.589  | 0.000  | 1.924 | N/A    | 0.000 |
| Fatty Acid $\alpha$ -oxidation                          | 0.302 | 1.913  | 0.632  | 1.360 | N/A    | 0.000 |
| Inhibition of Angiogenesis by TSP1                      | 0.277 | 1.459  | 0.535  | 1.693 | N/A    | 0.000 |
| Putrescine Degradation III                              | 0.277 | 2.793  | 0.577  | 2.107 | N/A    | 0.000 |
| Choline Biosynthesis III                                | 0.277 | 5.896  | 0.000  | 4.620 | N/A    | 0.714 |
| GNRH Signaling                                          | 0.272 | 3.447  | 0.429  | 2.152 | N/A    | 0.000 |
| eNOS Signaling                                          | 0.140 | 2.228  | 0.137  | 2.949 | N/A    | 0.346 |
| Calcium-induced T Lymphocyte Apoptosis                  | 0.000 | 0.802  | 0.500  | 0.414 | N/A    | 0.000 |
| Retinoate Biosynthesis I                                | 0.000 | 0.857  | 0.000  | 0.775 | N/A    | 0.414 |
| Amyloid Processing                                      | 0.000 | 1.346  | 0.000  | 0.972 | N/A    | 0.285 |
| D-myo-inositol (1,4,5)-Trisphosphate Biosynthesis       | 0.000 | 1.578  | -0.302 | 1.112 | N/A    | 0.000 |
| NAD Salvage Pathway II                                  | 0.000 | 1.721  | 0.000  | 1.607 | N/A    | 0.000 |
| Noradrenaline and Adrenaline Degradation                | 0.000 | 1.824  | 0.258  | 1.347 | N/A    | 0.000 |
| D-myo-inositol (1,3,4)-trisphosphate Biosynthesis       | 0.000 | 2.179  | -0.905 | 2.674 | N/A    | 0.000 |
| PFKFB4 Signaling Pathway                                | 0.000 | 2.189  | -0.447 | 2.016 | N/A    | 0.316 |
| Melatonin Degradation II                                | 0.000 | 2.362  | N/A    | 1.222 | N/A    | 0.000 |
| Acute Myeloid Leukemia Signaling                        | 0.000 | 2.374  | 0.180  | 2.932 | N/A    | 0.743 |
| UDP-N-acetyl-D-galactosamine Biosynthesis II            | 0.000 | 2.844  | 0.000  | 2.739 | N/A    | 0.000 |
| Endocannabinoid Neuronal Synapse Pathway                | 0.000 | 4.148  | -0.295 | 2.137 | N/A    | 0.000 |
| Leptin Signaling in Obesity                             | 0.000 | 5.619  | 0.218  | 4.375 | N/A    | 0.000 |

Supplemental Table 2.2: Canonical pathway analysis summary for rat cardiac IRI.



Supplemental Table 3.1: Canonical pathway analysis summary for rat cardiac IRI.

|                                                | Cohort 2 vs. Cohort 1 |                  |
|------------------------------------------------|-----------------------|------------------|
| Canonical Pathways                             | Z-score               | -log(BH-p-value) |
| Cardiac Hypertrophy Signaling (Enhanced)       | 4.903                 | 4.180            |
| Production of Nitric Oxide and Reactive Oxygen | 4.230                 | 3.545            |
| TREM1 Signaling                                | 4.200                 | 3.545            |
| Dendritic Cell Maturation                      | 4.003                 | 2.383            |
| iNOS Signaling                                 | 3.873                 | 2.746            |
| Neuroinflammation Signaling Pathway            | 3.845                 | 3.209            |
| Role of Pattern Recognition Receptors in Rec   | 3.800                 | 2.165            |
| Endothelin-1 Signaling                         | 3.753                 | 3.545            |
| Colorectal Cancer Metastasis Signaling         | 3.727                 | 3.040            |
| Gαq Signaling                                  | 3.651                 | 2.219            |
| Superpathway of Inositol Phosphate Compou      | 3.615                 | 4.279            |
| Opioid Signaling Pathway                       | 3.592                 | 0.716            |
| Tec Kinase Signaling                           | 3.536                 | 2.176            |
| NF-κB Signaling                                | 3.501                 | 5.251            |
| Fcγ Receptor-mediated Phagocytosis in Mac      | 3.400                 | 2.352            |
| Acute Phase Response Signaling                 | 3.395                 | 4.006            |
| Th17 Activation Pathway                        | 3.357                 | 0.404            |
| IL-8 Signaling                                 | 3.333                 | 1.783            |
| MIF-mediated Glucocorticoid Regulation         | 3.317                 | 1.788            |
| AMPK Signaling                                 | 3.307                 | 0.903            |
| Aldosterone Signaling in Epithelial Cells      | 3.300                 | 0.934            |
| IL-1 Signaling                                 | 3.300                 | 2.525            |
| IL-6 Signaling                                 | 3.280                 | 5.527            |
| Type I Diabetes Mellitus Signaling             | 3.272                 | 4.143            |
| Cardiac Hypertrophy Signaling                  | 3.244                 | 2.022            |
| NGF Signaling                                  | 3.182                 | 2.979            |
| Adrenomedullin signaling pathway               | 3.175                 | 3.713            |
| Synaptogenesis Signaling Pathway               | 3.151                 | 1.573            |
| G Beta Gamma Signaling                         | 3.130                 | 0.681            |
| Signaling by Rho Family GTPases                | 3.130                 | 1.883            |
| MIF Regulation of Innate Immunity              | 3.051                 | 1.892            |
| CCR3 Signaling in Eosinophils                  | 3.024                 | 3.155            |
| P2Y Purigenic Receptor Signaling Pathway       | 3.024                 | 2.292            |
| EGF Signaling                                  | 3.000                 | 1.708            |
| TNFR1 Signaling                                | 3.000                 | 2.350            |
| FGF Signaling                                  | 2.982                 | 1.454            |
| 3-phosphoinositide Biosynthesis                | 2.887                 | 3.254            |
| Toll-like Receptor Signaling                   | 2.887                 | 2.526            |
| Phospholipases                                 | 2.828                 | 1.991            |
| D-myo-inositol-5-phosphate Metabolism          | 2.777                 | 3.267            |
| Role of NFAT in Cardiac Hypertrophy            | 2.722                 | 2.253            |
| Androgen Signaling                             | 2.714                 | 0.427            |
| Gαi Signaling                                  | 2.711                 | 1.493            |
| Pancreatic Adenocarcinoma Signaling            | 2.711                 | 2.197            |
| VEGF Family Ligand-Receptor Interactions       | 2.711                 | 2.112            |
| 14-3-3-mediated Signaling                      | 2.694                 | 3.040            |

|                                               |       |       |
|-----------------------------------------------|-------|-------|
| Endocannabinoid Neuronal Synapse Pathway      | 2.683 | 0.356 |
| Growth Hormone Signaling                      | 2.668 | 1.473 |
| Thrombin Signaling                            | 2.667 | 2.072 |
| D-myo-inositol (1,4,5)-Trisphosphate Biosynt  | 2.646 | 0.853 |
| ErbB Signaling                                | 2.646 | 2.917 |
| RANK Signaling in Osteoclasts                 | 2.646 | 4.066 |
| CXCR4 Signaling                               | 2.611 | 2.263 |
| HGF Signaling                                 | 2.611 | 4.038 |
| Ephrin Receptor Signaling                     | 2.600 | 0.574 |
| IL-3 Signaling                                | 2.600 | 2.665 |
| PDGF Signaling                                | 2.600 | 2.526 |
| Th1 Pathway                                   | 2.556 | 3.254 |
| 3-phosphoinositide Degradation                | 2.530 | 3.038 |
| Phospholipase C Signaling                     | 2.530 | 1.780 |
| Role of NFAT in Regulation of the Immune Re   | 2.530 | 3.634 |
| TNFR2 Signaling                               | 2.530 | 1.745 |
| Cholecystokinin/Gastrin-mediated Signaling    | 2.502 | 1.708 |
| Mouse Embryonic Stem Cell Pluripotency        | 2.502 | 2.263 |
| STAT3 Pathway                                 | 2.502 | 3.634 |
| IL-23 Signaling Pathway                       | 2.500 | 1.991 |
| Triacylglycerol Biosynthesis                  | 2.496 | 1.496 |
| HMGB1 Signaling                               | 2.475 | 1.748 |
| Rac Signaling                                 | 2.475 | 3.038 |
| GNRH Signaling                                | 2.466 | 2.412 |
| D-myo-inositol (1,3,4)-trisphosphate Biosynth | 2.449 | 1.170 |
| Type II Diabetes Mellitus Signaling           | 2.449 | 2.483 |
| Glioblastoma Multiforme Signaling             | 2.414 | 0.940 |
| LPS-stimulated MAPK Signaling                 | 2.414 | 4.279 |
| Renin-Angiotensin Signaling                   | 2.414 | 2.714 |
| PI3K Signaling in B Lymphocytes               | 2.402 | 4.038 |
| Apelin Endothelial Signaling Pathway          | 2.401 | 3.634 |
| Renal Cell Carcinoma Signaling                | 2.400 | 3.548 |
| UVA-Induced MAPK Signaling                    | 2.400 | 2.626 |
| IL-7 Signaling Pathway                        | 2.357 | 1.639 |
| FLT3 Signaling in Hematopoietic Progenitor C  | 2.353 | 2.568 |
| NF-κB Activation by Viruses                   | 2.353 | 3.237 |
| Melatonin Signaling                           | 2.333 | 0.272 |
| Notch Signaling                               | 2.333 | 1.844 |
| FAT10 Cancer Signaling Pathway                | 2.309 | 1.301 |
| Apelin Cardiomyocyte Signaling Pathway        | 2.294 | 1.873 |
| CD28 Signaling in T Helper Cells              | 2.294 | 2.230 |
| Melanocyte Development and Pigmentation S     | 2.294 | 1.702 |
| Sperm Motility                                | 2.294 | 1.357 |
| p70S6K Signaling                              | 2.268 | 1.872 |
| ErbB2-ErbB3 Signaling                         | 2.236 | 2.291 |
| ErbB4 Signaling                               | 2.236 | 3.264 |
| Role of NANOG in Mammalian Embryonic Ste      | 2.236 | 0.864 |
| Synaptic Long Term Depression                 | 2.191 | 0.633 |

|                                                         |       |       |
|---------------------------------------------------------|-------|-------|
| ERK5 Signaling                                          | 2.183 | 1.346 |
| B Cell Receptor Signaling                               | 2.143 | 4.066 |
| Wnt/Ca+ pathway                                         | 2.138 | 1.035 |
| D-myo-inositol (1,4,5,6)-Tetrakisphosphate Biosynthesis | 2.137 | 2.965 |
| D-myo-inositol (3,4,5,6)-tetrakisphosphate Biosynthesis | 2.137 | 2.965 |
| Cdc42 Signaling                                         | 2.132 | 0.807 |
| PFKFB4 Signaling Pathway                                | 2.121 | 0.373 |
| Superpathway of D-myo-inositol (1,4,5)-trisphosphate    | 2.121 | 1.565 |
| CREB Signaling in Neurons                               | 2.117 | 1.127 |
| JAK/Stat Signaling                                      | 2.117 | 3.503 |
| CNTF Signaling                                          | 2.065 | 2.348 |
| Thrombopoietin Signaling                                | 2.065 | 1.994 |
| cAMP-mediated signaling                                 | 2.058 | 0.661 |
| Apelin Adipocyte Signaling Pathway                      | 2.000 | 0.807 |
| Integrin Signaling                                      | 2.000 | 0.844 |
| Leukocyte Extravasation Signaling                       | 2.000 | 1.668 |
| Pentose Phosphate Pathway                               | 2.000 | 0.949 |
| Role of JAK1, JAK2 and TYK2 in Interferon Signaling     | 2.000 | 1.475 |
| Urea Cycle                                              | 2.000 | 1.819 |
| Macropinocytosis Signaling                              | 1.964 | 2.203 |
| Prolactin Signaling                                     | 1.964 | 2.352 |
| VEGF Signaling                                          | 1.964 | 2.626 |
| IGF-1 Signaling                                         | 1.961 | 2.546 |
| p38 MAPK Signaling                                      | 1.961 | 1.977 |
| Paxillin Signaling                                      | 1.961 | 1.952 |
| PKCθ Signaling in T Lymphocytes                         | 1.947 | 3.209 |
| fMLP Signaling in Neutrophils                           | 1.915 | 4.252 |
| 1D-myo-inositol Hexakisphosphate Biosynthesis           | 1.890 | 1.639 |
| Mitochondrial L-carnitine Shuttle Pathway               | 1.890 | 1.756 |
| PAK Signaling                                           | 1.890 | 3.034 |
| SAPK/JNK Signaling                                      | 1.890 | 2.590 |
| GM-CSF Signaling                                        | 1.877 | 3.226 |
| IL-17A Signaling in Airway Cells                        | 1.877 | 3.209 |
| PEDF Signaling                                          | 1.877 | 2.977 |
| Huntington's Disease Signaling                          | 1.826 | 1.458 |
| Actin Cytoskeleton Signaling                            | 1.809 | 2.808 |
| Osteoarthritis Pathway                                  | 1.808 | 1.543 |
| Nitric Oxide Signaling in the Cardiovascular System     | 1.807 | 0.344 |
| UVB-Induced MAPK Signaling                              | 1.807 | 2.118 |
| Endocannabinoid Developing Neuron Pathway               | 1.800 | 1.487 |
| GDNF Family Ligand-Receptor Interactions                | 1.789 | 1.908 |
| mTOR Signaling                                          | 1.768 | 6.972 |
| Fc Epsilon RI Signaling                                 | 1.715 | 3.348 |
| Estrogen-Dependent Breast Cancer Signaling              | 1.698 | 2.292 |
| 4-1BB Signaling in T Lymphocytes                        | 1.667 | 2.379 |
| Inflammasome pathway                                    | 1.667 | 2.383 |
| Choline Biosynthesis III                                | 1.633 | 1.501 |
| D-myo-inositol (1,4,5)-trisphosphate Degradation        | 1.633 | 1.277 |

|                                                |       |        |
|------------------------------------------------|-------|--------|
| IL-17A Signaling in Gastric Cells              | 1.633 | 0.982  |
| Leukotriene Biosynthesis                       | 1.633 | 1.773  |
| Role of IL-17F in Allergic Inflammatory Airway | 1.633 | 0.256  |
| Superpathway of Citrulline Metabolism          | 1.633 | 1.501  |
| Glioma Signaling                               | 1.606 | 1.293  |
| IL-2 Signaling                                 | 1.606 | 2.582  |
| Regulation of eIF4 and p70S6K Signaling        | 1.606 | 11.288 |
| Lymphotoxin $\beta$ Receptor Signaling         | 1.604 | 2.053  |
| Death Receptor Signaling                       | 1.528 | 1.727  |
| Neurotrophin/TRK Signaling                     | 1.528 | 2.142  |
| Telomerase Signaling                           | 1.528 | 2.274  |
| CDP-diacylglycerol Biosynthesis I              | 1.508 | 2.713  |
| Eicosanoid Signaling                           | 1.508 | 1.547  |
| Ephrin B Signaling                             | 1.508 | 0.866  |
| Phosphatidylglycerol Biosynthesis II (Non-pla  | 1.508 | 2.489  |
| Agrin Interactions at Neuromuscular Junction   | 1.500 | 0.866  |
| Ovarian Cancer Signaling                       | 1.500 | 0.545  |
| ILK Signaling                                  | 1.461 | 0.504  |
| Endometrial Cancer Signaling                   | 1.414 | 2.291  |
| TGF- $\beta$ Signaling                         | 1.414 | 1.293  |
| ERK/MAPK Signaling                             | 1.406 | 1.991  |
| CD40 Signaling                                 | 1.400 | 4.066  |
| Oncostatin M Signaling                         | 1.387 | 1.822  |
| UVC-Induced MAPK Signaling                     | 1.387 | 1.564  |
| Cytotoxic T Lymphocyte-mediated Apoptosis      | 1.342 | 0.244  |
| Fatty Acid Activation                          | 1.342 | 1.233  |
| Interferon Signaling                           | 1.342 | 0.172  |
| Neuregulin Signaling                           | 1.342 | 1.293  |
| $\gamma$ -linolenate Biosynthesis II (Animals) | 1.342 | 0.837  |
| PI3K/AKT Signaling                             | 1.333 | 3.798  |
| Chemokine Signaling                            | 1.279 | 2.291  |
| Sphingosine-1-phosphate Signaling              | 1.279 | 0.843  |
| Synaptic Long Term Potentiation                | 1.279 | 0.540  |
| Stearate Biosynthesis I (Animals)              | 1.265 | 0.837  |
| $\alpha$ -Adrenergic Signaling                 | 1.265 | 0.729  |
| G $\alpha$ 12/13 Signaling                     | 1.257 | 2.609  |
| iCOS-iCOSL Signaling in T Helper Cells         | 1.225 | 1.906  |
| BMP signaling pathway                          | 1.213 | 0.840  |
| Non-Small Cell Lung Cancer Signaling           | 1.213 | 1.378  |
| IL-9 Signaling                                 | 1.155 | 1.881  |
| Pyridoxal 5'-phosphate Salvage Pathway         | 1.155 | 0.533  |
| SPINK1 General Cancer Pathway                  | 1.147 | 1.756  |
| Hypoxia Signaling in the Cardiovascular Syst   | 1.134 | 0.807  |
| Pyrimidine Ribonucleotides De Novo Biosynt     | 1.134 | 0.245  |
| Pyrimidine Ribonucleotides Interconversion     | 1.134 | 0.274  |
| Relaxin Signaling                              | 1.091 | 3.243  |
| Cell Cycle: G2/M DNA Damage Checkpoint F       | 1.069 | 2.080  |
| Role of PI3K/AKT Signaling in the Pathogenes   | 1.069 | 1.247  |

|                                                 |       |       |
|-------------------------------------------------|-------|-------|
| T Cell Exhaustion Signaling Pathway             | 1.061 | 2.592 |
| Apoptosis Signaling                             | 1.043 | 1.624 |
| Citrulline Biosynthesis                         | 1.000 | 1.218 |
| GDP-glucose Biosynthesis                        | 1.000 | 1.067 |
| Guanosine Nucleotides Degradation III           | 1.000 | 0.844 |
| IL-22 Signaling                                 | 1.000 | 1.892 |
| Induction of Apoptosis by HIV1                  | 1.000 | 1.639 |
| Melanoma Signaling                              | 1.000 | 2.244 |
| Tumoricidal Function of Hepatic Natural Killer  | 1.000 | 0.449 |
| Acute Myeloid Leukemia Signaling                | 0.962 | 4.066 |
| Glioma Invasiveness Signaling                   | 0.943 | 1.296 |
| Actin Nucleation by ARP-WASP Complex            | 0.905 | 0.272 |
| B Cell Activating Factor Signaling              | 0.905 | 2.715 |
| Leptin Signaling in Obesity                     | 0.905 | 1.624 |
| FcγRIIB Signaling in B Lymphocytes              | 0.894 | 2.857 |
| Apelin Muscle Signaling Pathway                 | 0.816 | 1.170 |
| Cardiac β-adrenergic Signaling                  | 0.816 | 2.206 |
| Glutathione-mediated Detoxification             | 0.816 | 0.401 |
| Granzyme B Signaling                            | 0.816 | 1.378 |
| NAD Phosphorylation and Dephosphorylation       | 0.816 | 1.773 |
| Apelin Pancreas Signaling Pathway               | 0.775 | 2.054 |
| Th2 Pathway                                     | 0.730 | 2.590 |
| CD27 Signaling in Lymphocytes                   | 0.728 | 3.556 |
| Salvage Pathways of Pyrimidine Ribonucleotides  | 0.728 | 0.533 |
| Small Cell Lung Cancer Signaling                | 0.728 | 2.197 |
| Role of RIG1-like Receptors in Antiviral Innate | 0.707 | 1.106 |
| VDR/RXR Activation                              | 0.632 | 0.398 |
| NRF2-mediated Oxidative Stress Response         | 0.626 | 3.040 |
| Antiproliferative Role of Somatostatin Receptor | 0.535 | 2.292 |
| April Mediated Signaling                        | 0.500 | 3.328 |
| RhoA Signaling                                  | 0.447 | 0.533 |
| UDP-N-acetyl-D-galactosamine Biosynthesis       | 0.447 | 1.502 |
| Endocannabinoid Cancer Inhibition Pathway       | 0.378 | 0.989 |
| Remodeling of Epithelial Adherens Junctions     | 0.378 | 0.596 |
| Insulin Receptor Signaling                      | 0.343 | 2.664 |
| Fatty Acid β-oxidation I                        | 0.333 | 1.216 |
| tRNA Splicing                                   | 0.277 | 1.892 |
| TWEAK Signaling                                 | 0.277 | 2.516 |
| Corticotropin Releasing Hormone Signaling       | 0.243 | 0.202 |
| Calcium-induced T Lymphocyte Apoptosis          | 0.000 | 0.000 |
| Ceramide Signaling                              | 0.000 | 1.639 |
| LPS/IL-1 Mediated Inhibition of RXR Function    | 0.000 | 2.040 |
| NAD Salvage Pathway II                          | 0.000 | 0.623 |
| Wnt/β-catenin Signaling                         | 0.000 | 0.000 |

Supplemental Table 3.2: Canonical pathway analysis summary for rat cardiac IRI.

|                                                    | Cohort 2 vs. Cohort 1 |                  |
|----------------------------------------------------|-----------------------|------------------|
| Canonical Pathways                                 | Z-score               | -log(BH-p-value) |
| Antioxidant Action of Vitamin C                    | -3.900                | 4.143            |
| PPAR Signaling                                     | -3.651                | 3.209            |
| EIF2 Signaling                                     | -3.046                | 22.200           |
| Oxidative Phosphorylation                          | -2.840                | 0.000            |
| Cell Cycle: G1/S Checkpoint Regulation             | -2.309                | 1.594            |
| NER Pathway                                        | -2.041                | 2.180            |
| p53 Signaling                                      | -1.941                | 0.477            |
| PTEN Signaling                                     | -1.461                | 2.567            |
| Role of p14/p19ARF in Tumor Suppression            | -1.414                | 1.053            |
| Amyloid Processing                                 | -1.000                | 1.025            |
| Role of CHK Proteins in Cell Cycle Checkpoint      | -1.000                | 1.873            |
| LXR/RXR Activation                                 | -0.853                | 1.639            |
| Valine Degradation I                               | -0.816                | 1.170            |
| Aryl Hydrocarbon Receptor Signaling                | -0.775                | 0.427            |
| Sirtuin Signaling Pathway                          | -0.762                | 2.596            |
| Sumoylation Pathway                                | -0.688                | 0.844            |
| Mitotic Roles of Polo-Like Kinase                  | -0.632                | 1.374            |
| Role of BRCA1 in DNA Damage Response               | -0.577                | 1.491            |
| ATM Signaling                                      | -0.500                | 0.843            |
| NAD biosynthesis II (from tryptophan)              | -0.447                | 1.000            |
| Purine Nucleotides De Novo Biosynthesis II         | -0.447                | 1.502            |
| Protein Kinase A Signaling                         | -0.384                | 2.698            |
| PPAR $\alpha$ /RXR $\alpha$ Activation             | -0.324                | 3.713            |
| Activation of IRF by Cytosolic Pattern Recognition | -0.302                | 0.427            |
| Regulation of Cellular Mechanics by Calpain I      | -0.302                | 0.677            |
| Angiopoietin Signaling                             | -0.243                | 3.217            |
| CDK5 Signaling                                     | -0.209                | 1.277            |

| Values           | Activation of Leukocytes | Inflammatory response | Leukocyte migration | Leukopoiesis | Lymphopoiesis | Recruitment of myeloid cells |
|------------------|--------------------------|-----------------------|---------------------|--------------|---------------|------------------------------|
| Combined p-Value | 1.31E-55                 | 1.06E-42              | 1.35E-43            | 8.70E-57     | 2.05E-54      | 1.06E-42                     |
| CCL2             | ✓                        | ✓                     | ✓                   | ✓            | -             | ✓                            |
| CCL3             | ✓                        | ✓                     | ✓                   | ✓            | ✓             | ✓                            |
| CCL4             | ✓                        | ✓                     | ✓                   | -            | -             | ✓                            |
| CCL5             | ✓                        | ✓                     | ✓                   | ✓            | ✓             | ✓                            |
| CD40             | ✓                        | ✓                     | ✓                   | ✓            | ✓             | ✓                            |
| c-FOS            | ✓                        | ✓                     | ✓                   | ✓            | ✓             | -                            |
| CHUK             | ✓                        | ✓                     | ✓                   | ✓            | ✓             | -                            |
| c-JUN            | -                        | -                     | ✓                   | ✓            | ✓             | -                            |
| CSF2             | ✓                        | ✓                     | ✓                   | ✓            | ✓             | ✓                            |
| CXCL1            | ✓                        | ✓                     | ✓                   | ✓            | ✓             | ✓                            |
| CXCL10           | ✓                        | ✓                     | ✓                   | ✓            | ✓             | ✓                            |
| CXCL2            | -                        | ✓                     | ✓                   | -            | -             | ✓                            |
| CXCL3            | ✓                        | ✓                     | ✓                   | ✓            | -             | ✓                            |
| CXCL6            | ✓                        | ✓                     | ✓                   | -            | -             | -                            |
| CXCL8            | ✓                        | ✓                     | ✓                   | ✓            | -             | ✓                            |
| CXCR4            | -                        | ✓                     | ✓                   | ✓            | ✓             | ✓                            |
| FAS              | ✓                        | -                     | ✓                   | ✓            | ✓             | -                            |
| ICAM1            | ✓                        | ✓                     | ✓                   | ✓            | ✓             | ✓                            |
| IFNA1/IFNA13     | ✓                        | ✓                     | -                   | ✓            | ✓             | -                            |
| IFNB1            | ✓                        | ✓                     | ✓                   | ✓            | ✓             | -                            |
| IFNG             | ✓                        | ✓                     | ✓                   | ✓            | ✓             | ✓                            |
| IKBKG            | ✓                        | ✓                     | ✓                   | ✓            | ✓             | -                            |
| IKK              | -                        | -                     | -                   | ✓            | ✓             | -                            |
| IL-1             | ✓                        | ✓                     | ✓                   | ✓            | ✓             | ✓                            |
| IL12A            | ✓                        | -                     | ✓                   | ✓            | ✓             | -                            |
| IL12B            | ✓                        | ✓                     | ✓                   | ✓            | ✓             | -                            |
| IL18             | ✓                        | ✓                     | ✓                   | ✓            | ✓             | ✓                            |
| IL1B             | ✓                        | ✓                     | ✓                   | ✓            | ✓             | ✓                            |
| IL1R1            | ✓                        | ✓                     | ✓                   | ✓            | ✓             | ✓                            |
| IL23A            | ✓                        | ✓                     | ✓                   | ✓            | ✓             | -                            |
| IL6              | ✓                        | ✓                     | ✓                   | ✓            | ✓             | ✓                            |
| IRAK1            | ✓                        | ✓                     | -                   | ✓            | ✓             | -                            |
| IRAK3            | ✓                        | ✓                     | -                   | ✓            | ✓             | -                            |
| IRAK4            | ✓                        | -                     | ✓                   | -            | -             | -                            |
| IRF1             | ✓                        | -                     | -                   | ✓            | ✓             | -                            |
| IRF8             | ✓                        | -                     | -                   | ✓            | ✓             | -                            |
| JAK2             | ✓                        | ✓                     | ✓                   | ✓            | -             | -                            |
| JNK              | ✓                        | ✓                     | ✓                   | ✓            | ✓             | -                            |
| JUNB             | -                        | -                     | -                   | ✓            | ✓             | -                            |
| MAPK8            | ✓                        | ✓                     | ✓                   | ✓            | ✓             | ✓                            |
| MMP1             | -                        | ✓                     | ✓                   | -            | -             | ✓                            |
| MMP9             | ✓                        | ✓                     | ✓                   | -            | -             | ✓                            |
| MYD88            | ✓                        | ✓                     | ✓                   | ✓            | ✓             | ✓                            |
| NFKB1            | ✓                        | ✓                     | ✓                   | ✓            | ✓             | -                            |
| NFKBIA           | ✓                        | ✓                     | ✓                   | ✓            | ✓             | ✓                            |
| NFKBIB           | -                        | ✓                     | -                   | -            | -             | -                            |
| NFKBID           | ✓                        | -                     | -                   | ✓            | ✓             | -                            |
| NFKBIZ           | ✓                        | ✓                     | ✓                   | ✓            | ✓             | -                            |
| NF-κB            | ✓                        | ✓                     | ✓                   | ✓            | ✓             | -                            |
| NIK              | -                        | -                     | ✓                   | ✓            | ✓             | -                            |
| p38MAPK          | ✓                        | ✓                     | ✓                   | ✓            | ✓             | ✓                            |
| PTGS2            | ✓                        | ✓                     | ✓                   | ✓            | ✓             | -                            |
| REL              | ✓                        | ✓                     | ✓                   | ✓            | ✓             | -                            |
| RELA             | ✓                        | ✓                     | ✓                   | ✓            | ✓             | -                            |
| TAB2             | ✓                        | -                     | -                   | ✓            | ✓             | -                            |
| TAK1             | ✓                        | -                     | -                   | ✓            | ✓             | -                            |
| TLR4             | ✓                        | ✓                     | ✓                   | ✓            | ✓             | ✓                            |
| TNF              | ✓                        | ✓                     | ✓                   | ✓            | ✓             | ✓                            |
| TNFAIP3          | ✓                        | ✓                     | ✓                   | ✓            | ✓             | -                            |
| TNFSF10          | ✓                        | -                     | ✓                   | ✓            | ✓             | -                            |
| TRAF6            | -                        | -                     | ✓                   | ✓            | ✓             | -                            |

Supplemental Table 4.

Supplemental Table 5. *Fold-change data, p-values, and FDR-corrected p-values for all genes and comparisons from RNAseq data. FDR p-values determined using the Benajmini-Hochberg method.*
